# Supplementary material for: Crosslinking Rapidly Cured Epoxy Resin Thermosets: Experimental and Computational Modeling and Simulation Study
Source: MDPI journal article supplement (doi:10.3390/polym15051325), 2023-03-06
Supplement: s1 [file s1]

# Supporting Information

## Crosslinking rapidly cured epoxy resin thermosets: experimental and computational modeling and simulation study

Ahmed Al-Qatatsheh,[a] Jaworski C. Capricho,[a] Paolo Raiteri,[b] Saulius Juodkazis,[a,c] Nisa Salim[a], and Nishar Hameed\*[a]

[a] School of Engineering, Swinburne University of Technology, Melbourne VIC 3122, Australia.

[b] School of Molecular and Life Sciences, Faculty of Science and Engineering, Curtin University, Perth WA 6845, Australia.

[c] Optical Sciences Centre and ARC Training Centre in Surface Engineering for Advanced Materials (SEAM), Swinburne University of Technology, Melbourne VIC 3122, Australia.

\* E-mail: nisharhameed@swin.edu.au

## Table of Contents

|                                                                                                                                          |   |
|------------------------------------------------------------------------------------------------------------------------------------------|---|
| <b>Table S1:</b> Atom charges of molecules used in the computational modeling based on RED. Methodology.                                 | 3 |
| <b>Table S2:</b> Atom charges of Li@3G with DGEBA used in the computational modeling based on MCPB Methodology.                          | 3 |
| <b>Figure S1:</b> Evaluation of the RDFs calculated for the liquid mixture as a function of the six simulated annealing cycles.          | 5 |
| <b>Figure S2:</b> Bond lengths and angles of the crosslink bonds for the equilibrated/crosslinked samples at 81.0 % crosslinking degree. | 5 |
| <b>Figure S3:</b> Calculated internal pressure of the sample after the crosslinking process.                                             | 5 |

**Table S1.** Atom charges of molecules used in the computational modeling based on RED Methodology.

| TFSI |      |         | MDA |      |         | DGEBA |      |         |     |      |         |
|------|------|---------|-----|------|---------|-------|------|---------|-----|------|---------|
| S/N  | Atom | Charge  | S/N | Atom | Charge  | S/N   | Atom | Charge  | S/N | Atom | Charge  |
| 1    | C1   | 0.4438  | 1   | C1   | -0.1871 | 1     | O1   | -0.3533 | 30  | H30  | 0.1002  |
| 2    | S2   | 0.7571  | 2   | H2   | 0.1892  | 2     | O2   | -0.3502 | 31  | H31  | 0.1002  |
| 3    | F3   | -0.1292 | 3   | C3   | -0.2885 | 3     | O3   | -0.3949 | 32  | C32  | -0.1314 |
| 4    | F4   | -0.1370 | 4   | H4   | 0.1712  | 4     | O4   | -0.3757 | 33  | H33  | 0.1547  |
| 5    | F5   | -0.1489 | 5   | C5   | 0.3879  | 5     | C5   | 0.1616  | 34  | C34  | -0.1614 |
| 6    | N6   | -0.7125 | 6   | C6   | -0.2988 | 6     | C6   | -0.0068 | 35  | H35  | 0.1585  |
| 7    | O7   | -0.4851 | 7   | H7   | 0.1818  | 7     | H7   | 0.1440  | 36  | C36  | -0.1602 |
| 8    | O8   | -0.4954 | 8   | C8   | -0.1933 | 8     | C8   | -0.0237 | 37  | H37  | 0.1658  |
| 9    | S9   | 0.9449  | 9   | H9   | 0.1544  | 9     | H9   | 0.1496  | 38  | C38  | -0.1638 |
| 10   | C10  | 0.2922  | 10  | C10  | 0.0283  | 10    | C10  | -0.0394 | 39  | H39  | 0.1626  |
| 11   | O11  | -0.5247 | 11  | C11  | -0.2598 | 11    | C11  | -0.0215 | 40  | C40  | 0.3364  |
| 12   | O12  | -0.5101 | 12  | H12  | 0.1729  | 12    | C12  | -0.0827 | 41  | C41  | 0.2898  |
| 13   | F13  | -0.0932 | 13  | C13  | -0.2202 | 13    | H13  | 0.1285  | 42  | C42  | -0.2535 |
| 14   | F14  | -0.1339 | 14  | H14  | 0.1613  | 14    | H14  | 0.1285  | 43  | H43  | 0.1527  |
| 15   | F15  | -0.0680 | 15  | C15  | 0.0378  | 15    | C15  | -0.072  | 44  | C44  | -0.2123 |
|      |      |         | 16  | C16  | -0.1988 | 16    | H16  | 0.1261  | 45  | H45  | 0.1445  |
|      |      |         | 17  | H17  | 0.1908  | 17    | H17  | 0.1261  | 46  | C46  | -0.2478 |
|      |      |         | 18  | C18  | -0.2633 | 18    | C18  | -0.1556 | 47  | H47  | 0.1107  |
|      |      |         | 19  | H19  | 0.1677  | 19    | H19  | 0.0422  | 48  | C48  | -0.2266 |
|      |      |         | 20  | C20  | 0.3462  | 20    | H20  | 0.0422  | 49  | H49  | 0.1086  |
|      |      |         | 21  | C21  | -0.0255 | 21    | H21  | 0.0422  |     |      |         |
|      |      |         | 22  | H22  | 0.0407  | 22    | C22  | -0.156  |     |      |         |
|      |      |         | 23  | H23  | 0.0407  | 23    | H23  | 0.0419  |     |      |         |
|      |      |         | 24  | N24  | -0.8843 | 24    | H24  | 0.0419  |     |      |         |
|      |      |         | 25  | H25  | 0.3604  | 25    | H25  | 0.0419  |     |      |         |
|      |      |         | 26  | H26  | 0.3604  | 26    | C26  | 0.1102  |     |      |         |
|      |      |         | 27  | N27  | -0.8859 | 27    | H27  | 0.0932  |     |      |         |
|      |      |         | 28  | H28  | 0.3569  | 28    | H28  | 0.0932  |     |      |         |
|      |      |         | 29  | H29  | 0.3569  | 29    | C29  | 0.0908  |     |      |         |

**Table S2.** Atom charges of Li@3G with DGEBA used in the computational modeling based on MCPB Methodology.

| Li@G3 with DGEBA |      |         |     |      |         |     |      |         |     |      |         |
|------------------|------|---------|-----|------|---------|-----|------|---------|-----|------|---------|
| S/N              | Atom | Charge  | S/N | Atom | Charge  | S/N | Atom | Charge  | S/N | Atom | Charge  |
| 1                | C1   | -0.0982 | 21  | H21  | 0.0567  | 41  | C41  | 0.3744  | 61  | O61  | -0.4076 |
| 2                | H2   | 0.0835  | 22  | H22  | 0.0567  | 42  | C42  | -0.362  | 62  | C62  | 0.2658  |
| 3                | H3   | 0.0835  | 23  | C23  | 0.0202  | 43  | H43  | 0.0855  | 63  | H63  | 0.0017  |
| 4                | H4   | 0.0835  | 24  | H24  | 0.0633  | 44  | H44  | 0.0855  | 64  | H64  | 0.0017  |
| 5                | O5   | -0.1628 | 25  | H25  | 0.0633  | 45  | H45  | 0.0855  | 65  | C65  | 0.0855  |
| 6                | C6   | -0.0621 | 26  | O26  | -0.2566 | 46  | C46  | -0.3668 | 66  | H66  | 0.0231  |
| 7                | H7   | 0.0756  | 27  | C27  | -0.1253 | 47  | H47  | 0.0868  | 67  | H67  | 0.0231  |
| 8                | H8   | 0.0756  | 28  | H28  | 0.0883  | 48  | H48  | 0.0868  | 68  | C68  | 0.4944  |
| 9                | C9   | 0.0276  | 29  | H29  | 0.0883  | 49  | H49  | 0.0868  | 69  | H69  | -0.036  |
| 10               | H10  | 0.0672  | 30  | H30  | 0.0883  | 50  | C50  | -0.2351 | 70  | C70  | 0.5474  |
| 11               | H11  | 0.0672  | 31  | C31  | -0.0918 | 51  | H51  | 0.1505  | 71  | H71  | -0.0795 |
| 12               | O12  | -0.1681 | 32  | H32  | 0.118   | 52  | C52  | -0.1666 | 72  | O72  | -0.4436 |
| 13               | C13  | -0.0966 | 33  | C33  | -0.3029 | 53  | H53  | 0.1185  | 73  | O73  | -0.846  |
| 14               | H14  | 0.0814  | 34  | H34  | 0.1494  | 54  | C54  | 0.006   | 74  | C74  | -0.4199 |
| 15               | H15  | 0.0814  | 35  | C35  | 0.3819  | 55  | C55  | -0.181  | 75  | H75  | 0.1096  |
| 16               | C16  | 0.1147  | 36  | C36  | -0.2562 | 56  | H56  | 0.1227  | 76  | H76  | 0.1096  |
| 17               | H17  | 0.0616  | 37  | H37  | 0.1187  | 57  | C57  | -0.2255 | 77  | C77  | -0.1992 |
| 18               | H18  | 0.0616  | 38  | C38  | -0.1242 | 58  | H58  | 0.1396  | 78  | H78  | 0.0703  |
| 19               | O19  | -0.3474 | 39  | H39  | 0.1282  | 59  | C59  | 0.3548  | 79  | H79  | 0.0703  |
| 20               | C20  | 0.0542  | 40  | C40  | -0.0636 | 60  | O60  | -0.3797 | 80  | Li1  | 0.4783  |

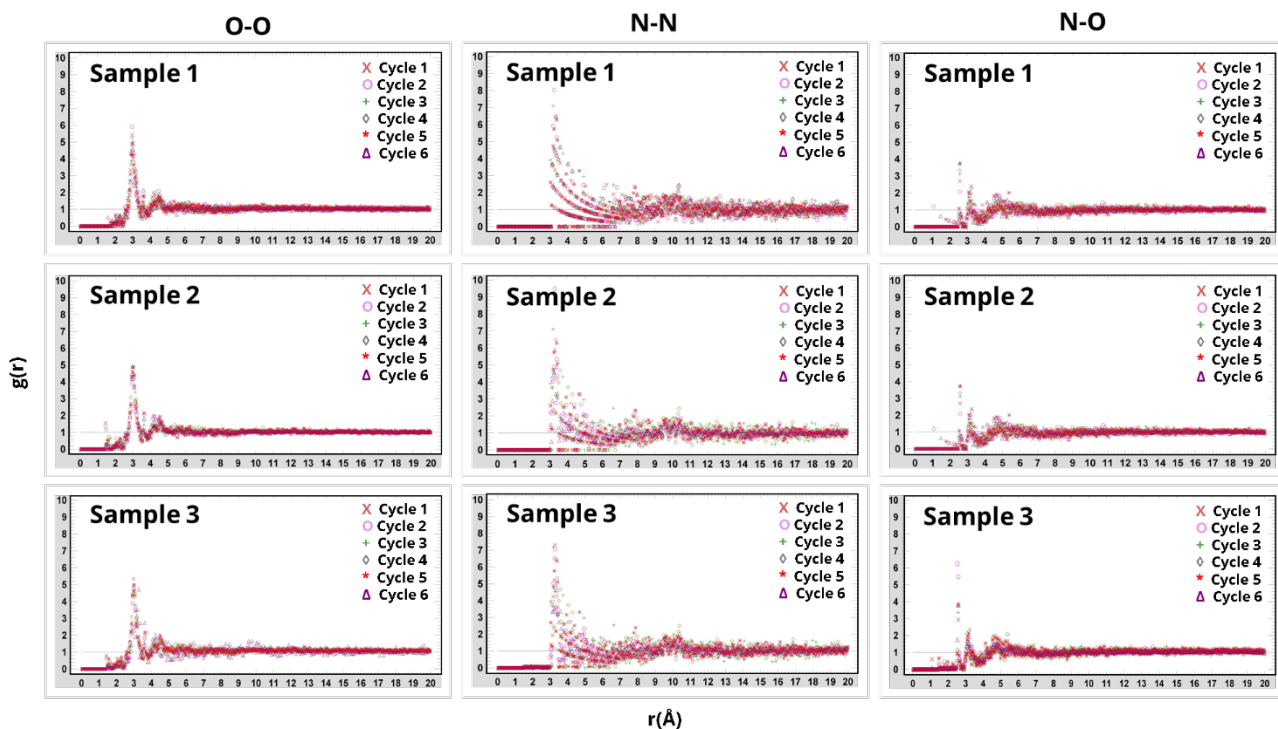

Figure S1. Evaluation of the RDFs calculated for the liquid mixture as a function of the six simulated annealing cycles.

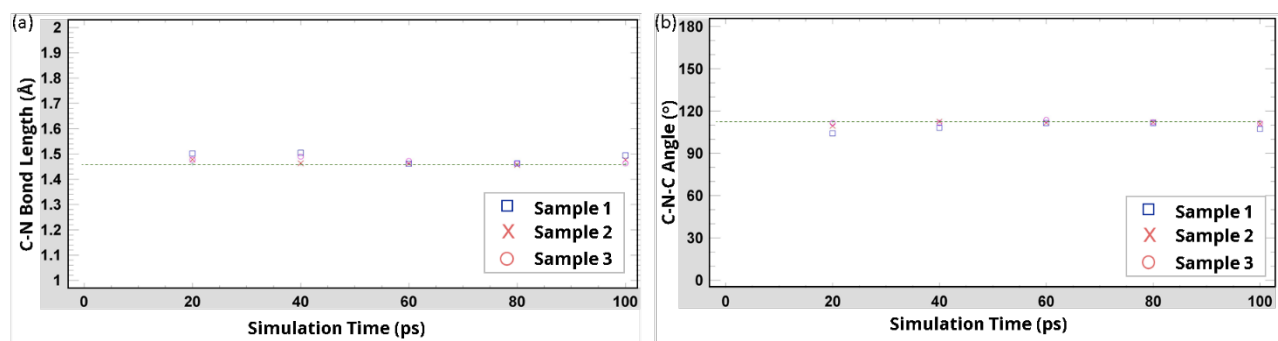

Figure S2. (a) Bond lengths of the crosslink bonds, and (b) bond angles between the C-N-C atoms of the crosslink bonds for equilibrated crosslinked samples at 81.0 % crosslinking degree. The dashed lines represent the AMBER Force Field ideal values.

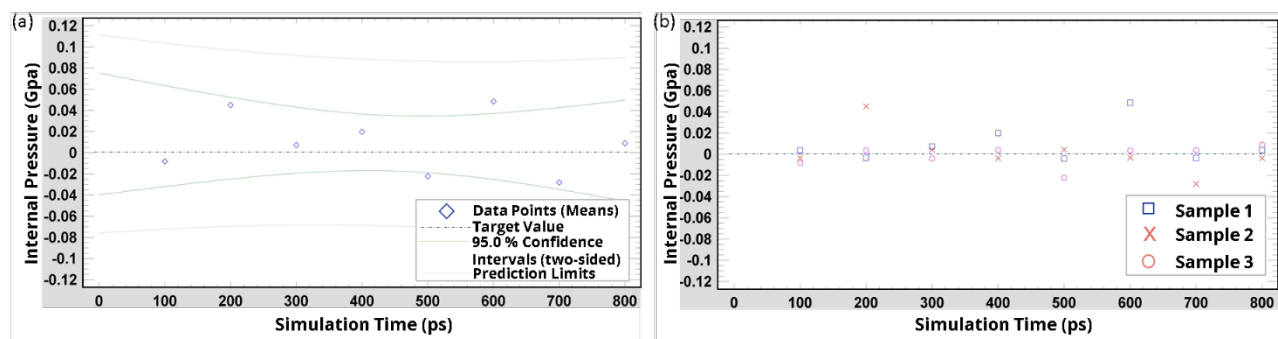

Figure S3. (a) Calculated average internal pressure of the sample after the crosslinking process, and (b) the internal pressure of the three crosslinked samples. The dashed line represents the target pressure, 0.0001 GPa.
